# Supplementary material
Source: PubMed Central journal article supplement (PMC8594622)
Supplement: NIHMS1752781-supplement-1.pdf [file NIHMS1752781-supplement-1.pdf]

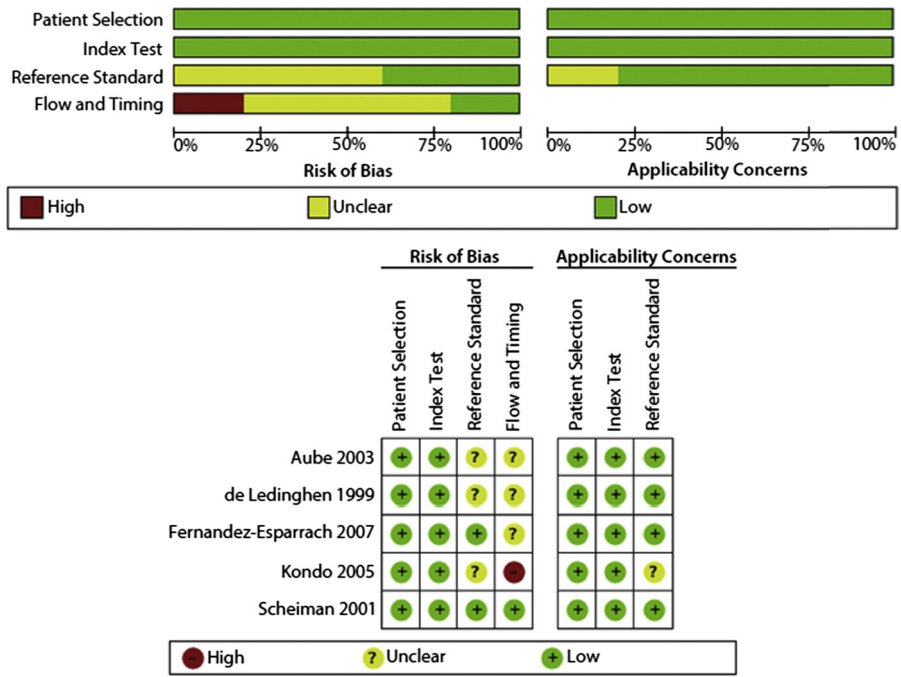

**Supplementary Figure 1.** Quality parameters of studies comparing EUS versus MRCP for confirmation of choledocholithiasis. (Adapted from Meeralam et al,<sup>25</sup> Fig. 2, with permission.)

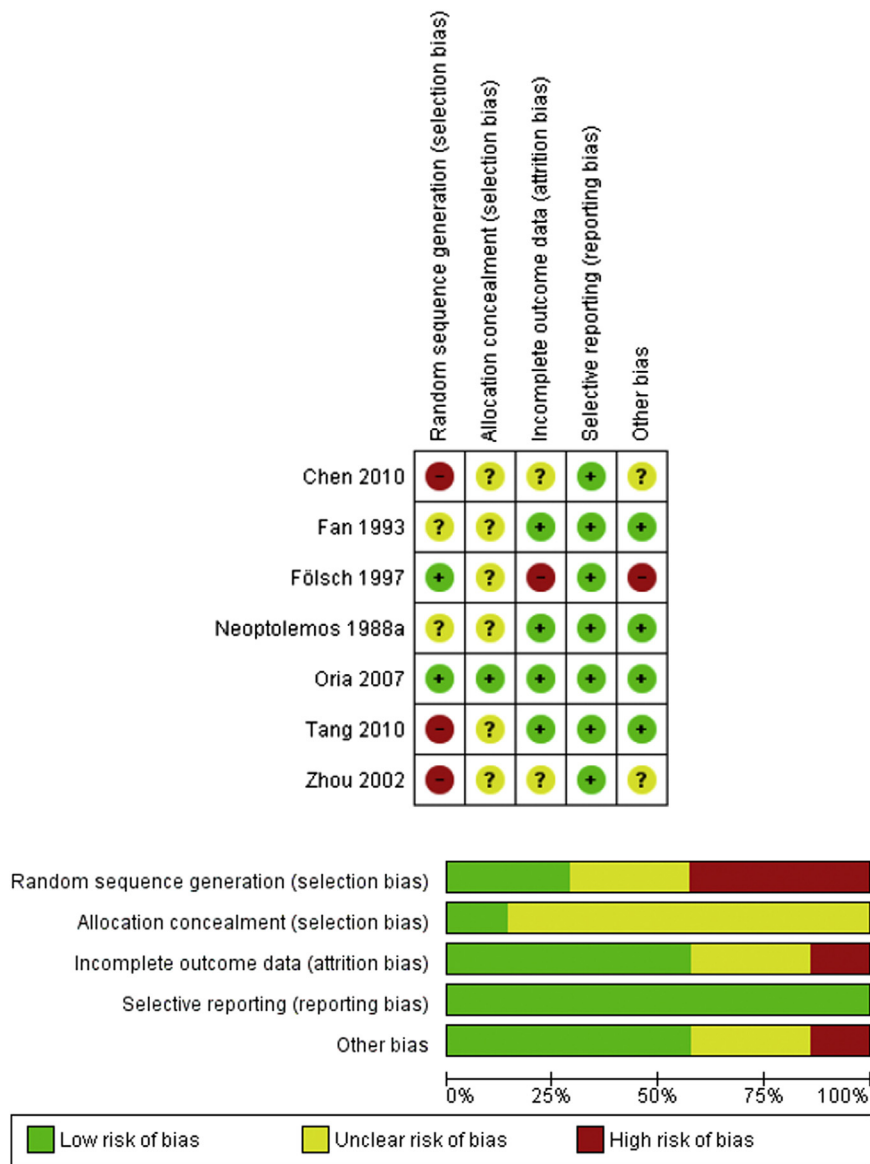

**Supplementary Figure 2.** Quality parameters of studies comparing early ERCP versus conservative management for choledocholithiasis. (Adapted from Meeralam et al,<sup>25</sup> Figs. 2-3, with permission.)

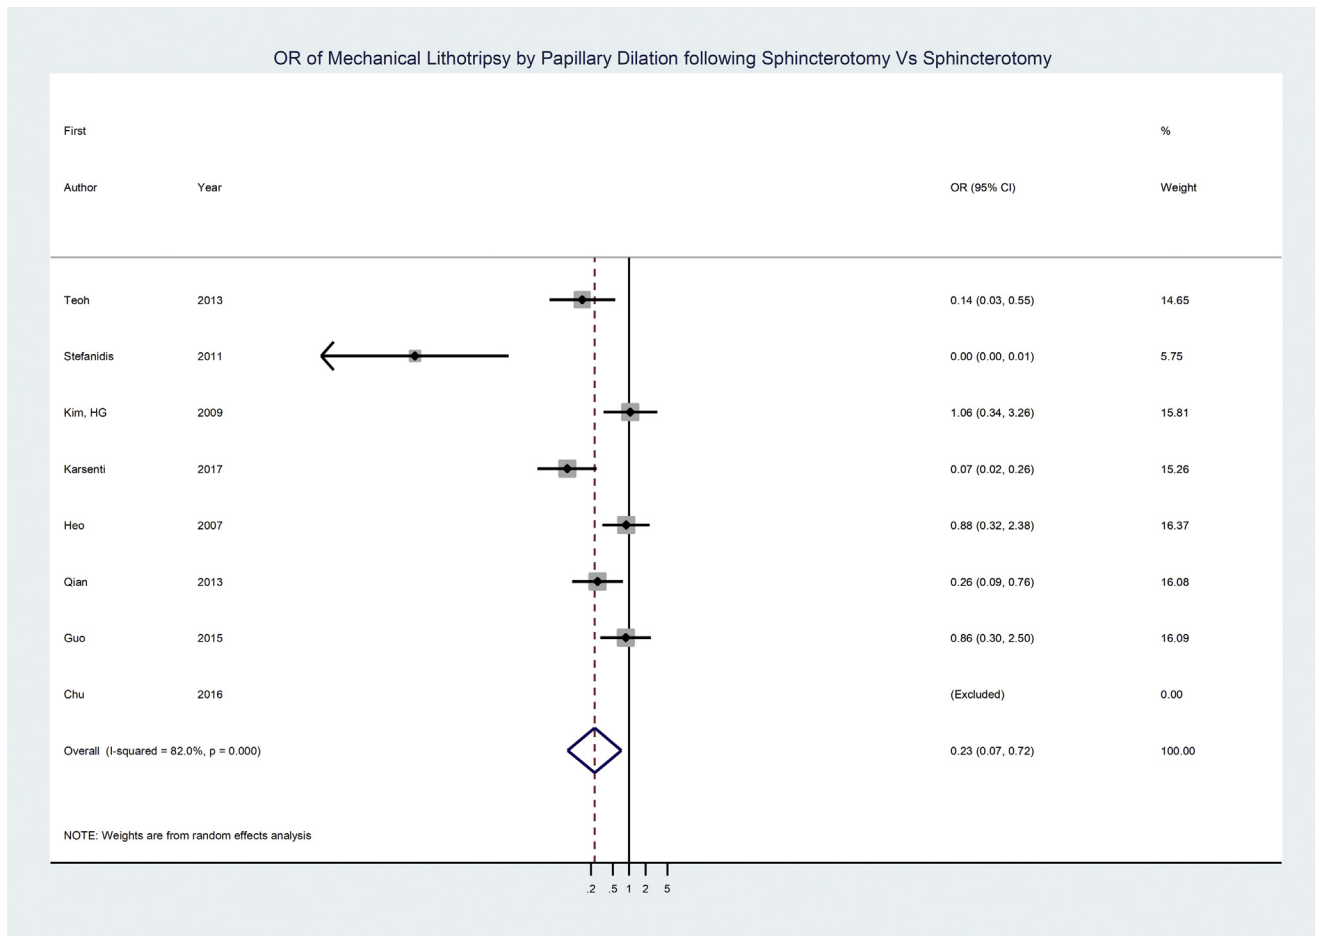

**Supplementary Figure 3.** Forest plot for randomized trials comparing mechanical lithotripsy requirement by ES-LBD versus ES. *ES-LBD*, Endoscopic sphincterotomy followed by large balloon dilation.

OR of Stone Clearance by Papillary Dilation following Sphincterotomy Vs Sphincterotomy

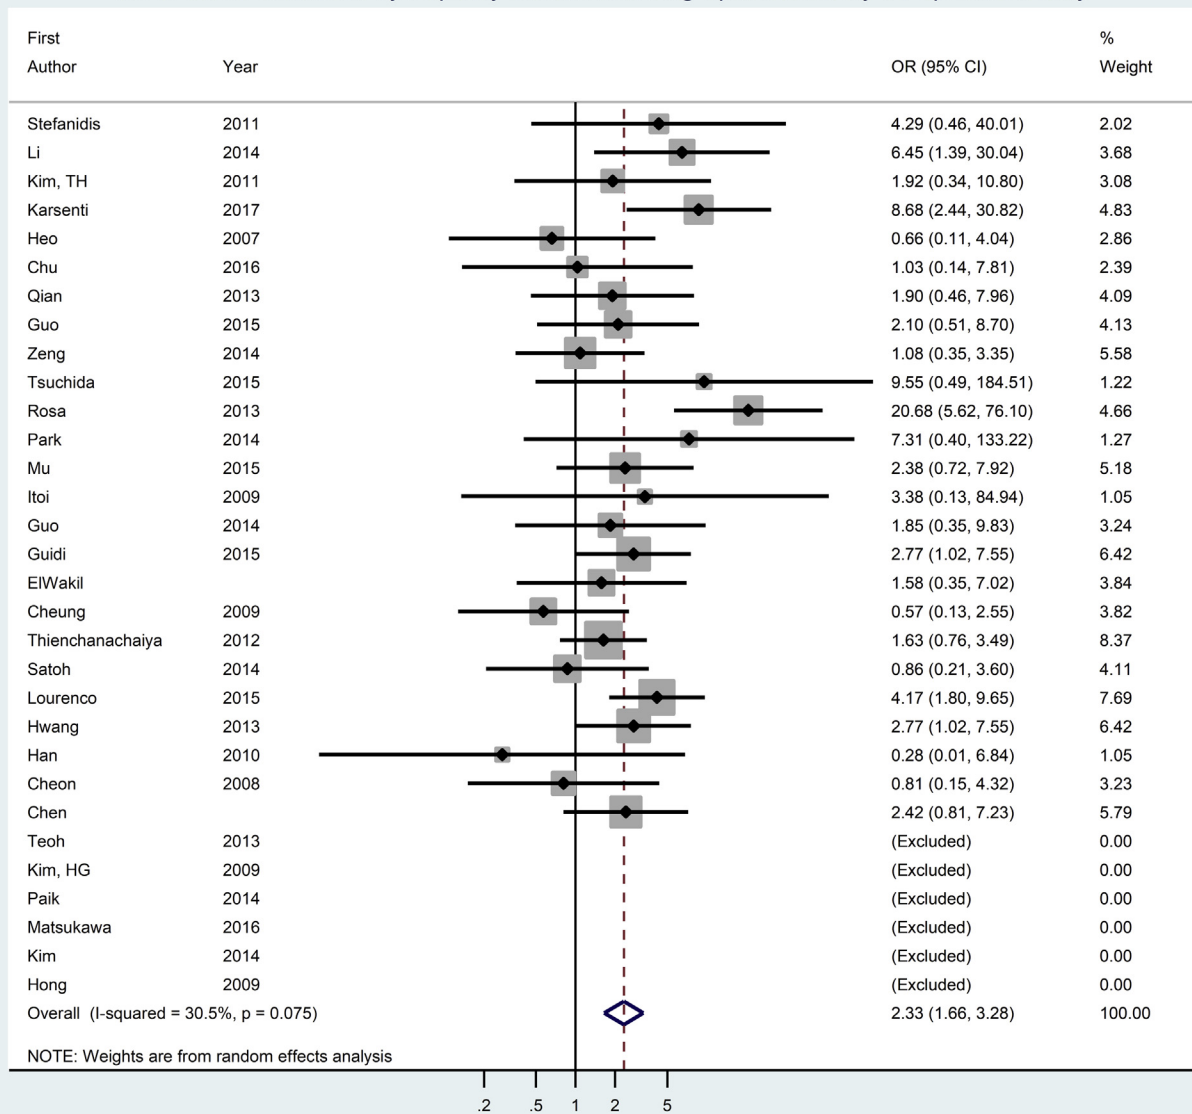

**Supplementary Figure 4.** Forest plot for randomized and observational studies comparing stone clearance for ES-LBD versus ES. *ES-LBD*, Endoscopic sphincterotomy followed by large balloon dilation.

OR of First Procedure Stone Clearance by Papillary Dilation following Sphincterotomy Vs Sphincterotomy

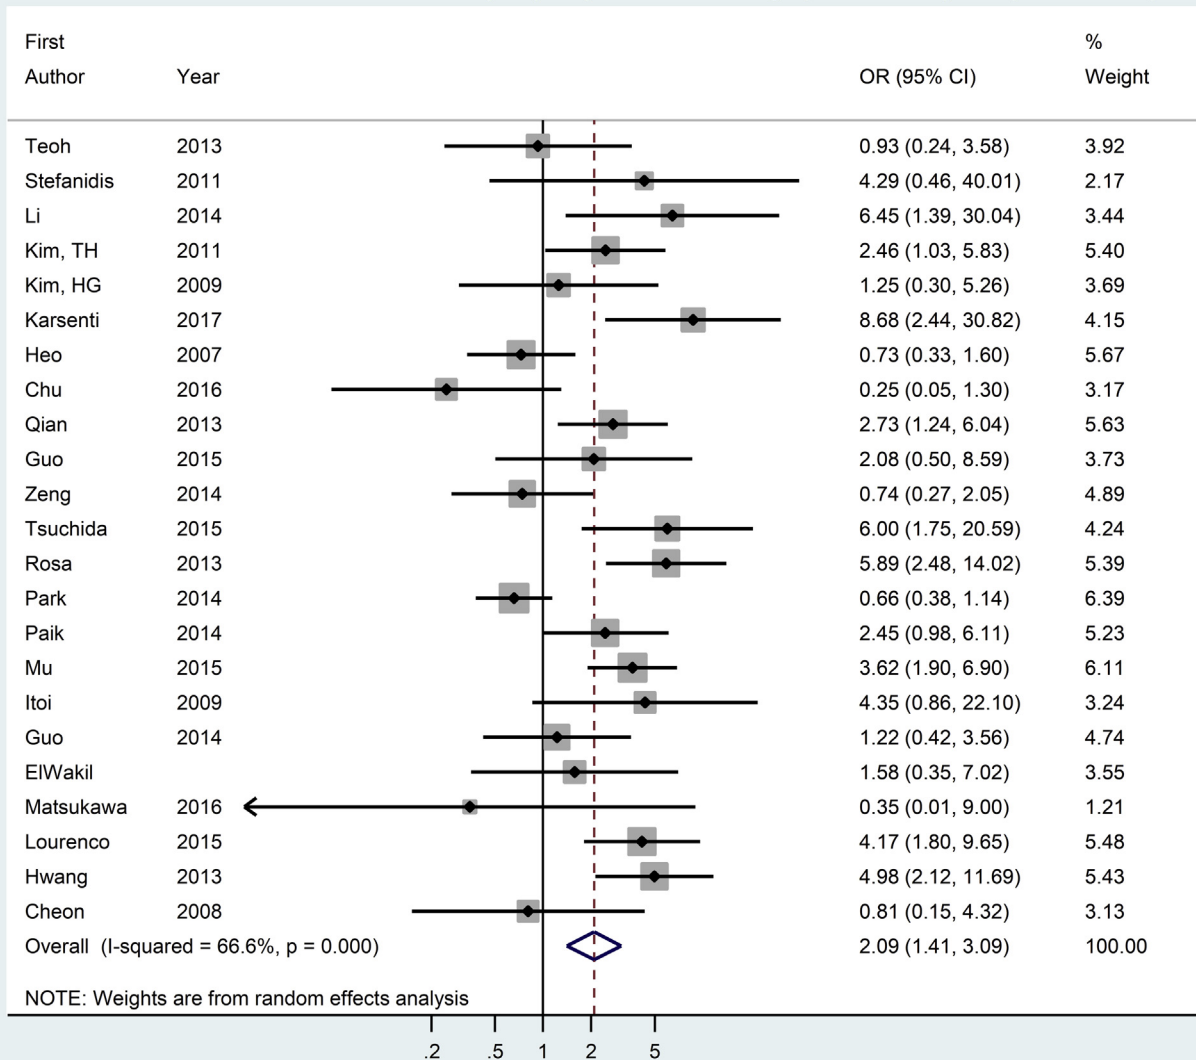

**Supplementary Figure 5.** Forest plot for randomized and observational studies comparing first procedure stone clearance for ES-LBD versus ES. *ES-LBD*, Endoscopic sphincterotomy followed by large balloon dilation.

**SUPPLEMENTARY FIGURE 6. Quality parameters of studies comparing large balloon dilation after sphincterotomy versus endoscopic sphincterotomy alone for large ( $\geq 1$  cm) bile duct stones**

| First author and year         | Random sequence generation | Allocation concealment | Incomplete outcomes | Selective reporting | Other |
|-------------------------------|----------------------------|------------------------|---------------------|---------------------|-------|
| Heo 2007 <sup>60</sup>        | ?                          | ?                      | +                   | +                   | ?     |
| Kim 2009 <sup>62</sup>        | ?                          | ?                      | +                   | +                   | ?     |
| Stefanidis 2011 <sup>70</sup> | +                          | +                      | +                   | +                   | ?     |
| Teoh 2013 <sup>8</sup>        | +                          | +                      | ?                   | +                   | +     |
| Bo 2013                       | +                          | +                      | ?                   | +                   | ?     |
| Li 2014                       | +                          | +                      | +                   | ?                   | ?     |
| Guo 2015                      | +                          | ?                      | +                   | +                   | ?     |
| Chu 2017                      | +                          | ?                      | +                   | +                   | ?     |
| Karsenti 2017 <sup>57</sup>   | +                          | +                      | +                   | +                   | ?     |

+, High risk of bias; -, low risk of bias; ?, unclear risk of bias.

Higgins JP, Altman DG, Gotzsche P, et al. The Cochrane Collaboration's tool for assessing risk of bias in randomised trials. *Gut* 2011;18:1-9.

**SUPPLEMENTARY TABLE 1. Test characteristics of studies comparing EUS versus MRCP for choledocholithiasis**

| First author                      | N   | EUS sensitivity<br>95% CI | EUS specificity (95% CI) | MRCP sensitivity (95% CI) | MRCP specificity (95% CI) |
|-----------------------------------|-----|---------------------------|--------------------------|---------------------------|---------------------------|
| Fernandez-Esparrach <sup>26</sup> | 135 | .97 (.89-1.00)            | .85 (.74-.93)            | .89 (.78-.95)             | .98 (.90-1.00)            |
| Kondo <sup>27</sup>               | 28  | 1.00 (.86-1.00)           | .50 (.07-.93)            | .88 (.68-.97)             | .75 (.19-.99)             |
| Aube <sup>28</sup>                | 47  | .94 (.74-1.00)            | .96 (.80-1.00)           | .88 (.62-.98)             | .96 (.80-1.00)            |
| de Ledinghen <sup>29</sup>        | 32  | 1.00 (.69-1.00)           | .95 (.77-1.00)           | 1.00 (.69-1.00)           | .73 (.50-.89)             |
| Scheiman <sup>17</sup>            | 30  | .89 (.28-.99)             | .96 (.78-1.00)           | .40 (.05-.85)             | .96 (.78-1.00)            |

Adapted with permission from Meeralam et al,<sup>25</sup> Table 1.

**SUPPLEMENTARY TABLE 2. Design of studies comparing EUS versus MRCP for choledocholithiasis**

| First author                      | Reference test                           | Time between EUS and MRCP | Blinding                  |
|-----------------------------------|------------------------------------------|---------------------------|---------------------------|
| Fernandez-Esparrach <sup>26</sup> | ERCP, IOC, long-term (6-month) follow-up | 24 h                      | Index and reference tests |
| Kondo <sup>27</sup>               | ERCP                                     | Not reported              | Index and reference tests |
| Aube <sup>28</sup>                | ERCP, IOC, long-term (3-month) follow-up | <48 h                     | Index tests               |
| de Ledinghen <sup>29</sup>        | ERCP or IOC                              | Not reported              | Index tests               |
| Scheiman <sup>17</sup>            | ERCP                                     | 24 h                      | Index and reference tests |

IOC, intraoperative cholangiography.

Adapted with permission from Meeralam et al,<sup>25</sup> Table 1.

**SUPPLEMENTARY TABLE 3A. Systematic search for studies comparing endoscopic papillary dilation after sphincterotomy versus sphincterotomy alone for large bile duct stones. Medline**

|                                                                                                                                                                                                                                                                                                                                                             |
|-------------------------------------------------------------------------------------------------------------------------------------------------------------------------------------------------------------------------------------------------------------------------------------------------------------------------------------------------------------|
| <b>Database Names:</b> Ovid Medline® Epub Ahead of Print, In-Process & Other Non-Indexed Citations, Ovid Medline® Daily, Ovid Medline®                                                                                                                                                                                                                      |
| <b>Database Vendor:</b> Wolters Kluwer                                                                                                                                                                                                                                                                                                                      |
| <b>Database Coverage:</b> 1946 - Present                                                                                                                                                                                                                                                                                                                    |
| <b>Date Last Searched:</b> September 21, 2017                                                                                                                                                                                                                                                                                                               |
| (exp Lasers/ OR exp Laser Therapy/ OR exp Lithotripsy/ OR laser.af OR lasers.af OR lithotripsy.af OR lithotripsie.af OR lithotripsies.af OR litholapaxy.af OR litholapaxie.af OR litholapaxies.af OR lithotripty.af OR lithotripter.af OR lithotriptor.af OR ESWL.af OR ESWLs.af OR shock-wave.af OR shockwave.af OR "pulveriz*".af)                        |
| AND                                                                                                                                                                                                                                                                                                                                                         |
| (expCholedocholithiasis/ OR exp Common Bile Duct/ OR "common bile duct".af OR choledocholithiasis.af OR choledocholithias.es.af OR ("bile duct".af OR biliary.af OR choledochal.af OR choledochus.af OR "common duct".af) adj8 (stone.af OR stones.af OR calculus.af OR calculi.af OR gallstone.af OR gallstones.af OR "gall stone".af OR "gallstones".af)) |

**SUPPLEMENTARY TABLE 3B. Embase**

|                                                                                                                                                                                                                                                                                                                          |
|--------------------------------------------------------------------------------------------------------------------------------------------------------------------------------------------------------------------------------------------------------------------------------------------------------------------------|
| <b>Database Name:</b> Embase & Embase Classic                                                                                                                                                                                                                                                                            |
| <b>Database Vendor:</b> Elsevier                                                                                                                                                                                                                                                                                         |
| <b>Database Coverage:</b> 1947 - Present                                                                                                                                                                                                                                                                                 |
| <b>Date Last Searched:</b> September 21, 2017                                                                                                                                                                                                                                                                            |
| ('laser'/exp OR 'low level laser therapy'/exp OR 'lithotripsy'/exp OR 'lithotripter'/exp OR laser OR lasers OR lithotrip* OR litholapaxy OR litholapaxie OR litholapaxies OR lithotripty OR ESWL OR ESWLs OR 'shock wave' OR shockwave OR pulveriz*)                                                                     |
| AND                                                                                                                                                                                                                                                                                                                      |
| (('common bile duct stone'/exp OR 'common bile duct'/exp OR 'common bile duct' OR choledocholithiasis OR choledocholithias.es) OR (('bile duct' OR biliary OR choledochal OR choledochus OR 'common duct') NEAR/8 (stone OR stones OR calculus OR calculi OR gallstone OR gallstones OR 'gall stone' OR 'gall stones'))) |

**SUPPLEMENTARY TABLE 3C. Cochrane**

|                                                                                                                                                                                                                                                                                                                                                   |
|---------------------------------------------------------------------------------------------------------------------------------------------------------------------------------------------------------------------------------------------------------------------------------------------------------------------------------------------------|
| <b>Database Name:</b> Cochrane Library                                                                                                                                                                                                                                                                                                            |
| <b>Database Vendor:</b> Wiley                                                                                                                                                                                                                                                                                                                     |
| <b>Issues Searched:</b> Cochrane Reviews (Issue 9 of 12, September 2017)<br>Other Reviews (Issue 2 of 4, April 2015)<br>Trials (Issue 9 of 12, September 2017)<br>Methods Studies (Issue 3 of 4, July 2012)<br>Technology Assessments (Issue 4 of 4, October 2016)<br>Economic Evaluations (Issue 2 of 4, April 2015)                             |
| <b>Date Last Searched:</b> September 21, 2017                                                                                                                                                                                                                                                                                                     |
| [mh lasers] OR [mh "laser therapy"] OR [mh lithotripsy] OR laser OR lasers OR lithotripsy OR lithotripsies OR litholapaxy OR lithotripty OR lithotripter OR ESWL OR ESWLs OR 'shock wave' OR shockwave OR pulveriz*)                                                                                                                              |
| AND                                                                                                                                                                                                                                                                                                                                               |
| (([mh choledocholithiasis] OR [mh "common bile duct"] /exp OR 'common bile duct'/exp OR 'common bile duct' OR choledocholithiasis OR choledocholithias.es) OR (('bile duct' OR biliary OR choledochal OR choledochus OR "common duct") AND (stone OR stones OR calculus OR calculi OR gallstone OR gallstones OR 'gall stone' OR 'gall stones'))) |

**SUPPLEMENTARY TABLE 3D. Web of Science**

|                                                                                                                                              |
|----------------------------------------------------------------------------------------------------------------------------------------------|
| <b>Database Names:</b> Web of Science Core Collection                                                                                        |
| <b>Database Vendor:</b> Clarivate Analytics                                                                                                  |
| <b>Database Coverage:</b> Science Citation Index Expanded (1900-present)                                                                     |
| Social Sciences Citation Index (1900-present)                                                                                                |
| Arts & Humanities Citation Index (1975-present)                                                                                              |
| Conference Proceedings Citation Index-Science (1990-present)                                                                                 |
| Conference Proceedings Citation Index-Social Science & Humanities (1990-present)                                                             |
| Book Citation Index -Science (2005-present)                                                                                                  |
| Book Citation Index - Social Sciences & Humanities (2005-present)                                                                            |
| Emerging Sources Citation Index (2015-present)                                                                                               |
| Current Chemical Reactions (1985-present)                                                                                                    |
| Index Chemicus (1993-present)                                                                                                                |
| <b>Date Last Searched:</b> September 21, 2017                                                                                                |
| (lasers OR lithotrip* OR litholapaxy OR litholapaxie OR litholapaxies OR lithotrity OR                                                       |
| ESWL OR ESWLs OR shock-wave OR shockwave OR pulveriz*)                                                                                       |
| AND                                                                                                                                          |
| ((“common bile duct” OR choledocholithiasis OR choledocholithiases) OR (“bile duct” OR biliary OR choledochal OR choledocus OR “common duct” |
| NEAR/8                                                                                                                                       |
| (stones OR calculi OR gallstones OR “gall stone” OR “gall stones”))                                                                          |

**SUPPLEMENTARY TABLE 4A. Systematic search for studies of intraductal and conventional treatment of large and difficult bile duct choledocholithiasis. Medline**

|                                                                                                                                                    |
|----------------------------------------------------------------------------------------------------------------------------------------------------|
| <b>Database Names:</b> Ovid Medline® Epub Ahead of Print, In-Process & Other Non-Indexed Citations, Ovid Medline® Daily, Ovid Medline®             |
| <b>Database Vendor:</b> Wolters Kluwer                                                                                                             |
| <b>Database Coverage:</b> 1946 - Present                                                                                                           |
| <b>Date Last Searched:</b> November 16, 2017                                                                                                       |
| (exp Balloon Enteroscopy/ OR exp Dilatation/ OR Balloon.af. OR Dilatation.af. OR Dilation.af. OR Dilate.af.)                                       |
| AND                                                                                                                                                |
| (exp Sphincterotomy, Endoscopic/ OR “Sphincter of Oddi”/su OR Sphincterotomy, Transhepatic/ OR “Ampulla of Vater”/su OR exp                        |
| Cholangiopancreatography, Endoscopic Retrograde/ OR Endoscopic Retrograde Cholangiopancreatography.af. OR Endoscopic Retrograde                    |
| Cholangiopancreatographies.af. OR Sphincterotomy.af. OR Sphincterotomies.af. OR Papillotomy.af. OR Papillotomies.af. OR Sphincteroplasty.af. OR    |
| Sphincteroplasties.af. OR Papillosphincteroplasty.af. OR Papillosphincteroplasties.af. OR Papillostomy.af. OR papillostomies.af.)                  |
| AND                                                                                                                                                |
| (exp Choledocholithiasis/ OR exp Common Bile Duct/ OR “common bile duct”.af OR choledocholithiasis.af OR choledocholithiases.af OR (“bile duct”.af |
| OR biliary.af OR choledochal.af OR choledochus.af OR “common duct”.af) adj8 (stone.af OR stones.af OR calculus.af OR calculi.af OR gallstone.af OR |
| gallstones.af OR “gall stone”.af OR “gall stones”.af))                                                                                             |



**SUPPLEMENTARY TABLE 4B. Embase**

|                                                                                                                                                                                                                                                                                                                                                                                                                                                                                  |
|----------------------------------------------------------------------------------------------------------------------------------------------------------------------------------------------------------------------------------------------------------------------------------------------------------------------------------------------------------------------------------------------------------------------------------------------------------------------------------|
| <b>Database Name:</b> Embase & Embase Classic                                                                                                                                                                                                                                                                                                                                                                                                                                    |
| <b>Database Vendor:</b> Elsevier                                                                                                                                                                                                                                                                                                                                                                                                                                                 |
| <b>Database Coverage:</b> 1947 - Present                                                                                                                                                                                                                                                                                                                                                                                                                                         |
| <b>Date Last Searched:</b> November 16, 2017                                                                                                                                                                                                                                                                                                                                                                                                                                     |
| ('balloon enteroscopy'/exp OR 'balloon dilatation'/exp OR 'balloon catheterization'/exp OR 'balloon'/exp OR 'dilatation'/exp OR 'dilatation catheter'/exp OR dilatation OR dilation OR dilate)                                                                                                                                                                                                                                                                                   |
| AND                                                                                                                                                                                                                                                                                                                                                                                                                                                                              |
| ('sphincterotomy'/exp OR 'endoscopic sphincterotomy'/exp OR 'vater papillotomy'/exp OR 'endoscopic retrograde cholangiopancreatography'/exp OR (Endoscopic AND Retrograde AND Cholangiopancreatography) OR (Endoscopic AND Retrograde AND Cholangiopancreatographies) OR Sphincterotomy OR Sphincterotomies OR Papillotomy OR Papillotomies OR Sphincteroplasty OR Sphincteroplasties OR Papillosphincteroplasty OR Papillosphincteroplasties OR Papillostomy OR papillostomies) |
| AND                                                                                                                                                                                                                                                                                                                                                                                                                                                                              |
| (('common bile duct stone'/exp OR 'common bile duct'/exp OR 'common bile duct' OR choledocholithiasis OR choledocholithiasis) OR (('bile duct' OR biliary OR choledochal OR choledochus OR 'common duct') NEAR/8 (stone OR stones OR calculus OR calculi OR gallstone OR gallstones OR 'gall stone' OR 'gall stones')))                                                                                                                                                          |

**SUPPLEMENTARY TABLE 4C. Cochrane**

|                                                                          |
|--------------------------------------------------------------------------|
| <b>Database Name:</b> Cochrane Library                                   |
| <b>Database Vendor:</b> Wiley                                            |
| <b>Issues Searched:</b> Cochrane Reviews (Issue 9 of 12, September 2017) |
| Other Reviews (Issue 2 of 4, April 2015)                                 |
| Trials (Issue 9 of 12, September 2017)                                   |
| Methods Studies (Issue 3 of 4, July 2012)                                |
| Technology Assessments (Issue 4 of 4, October 2016)                      |
| Economic Evaluations (Issue 2 of 4, April 2015)                          |
| <b>Date Last Searched:</b> November 16, 2017                             |
| #1 MeSH descriptor: [Choledocholithiasis] explode all trees              |
| #2 MeSH descriptor: [Common Bile Duct] explode all trees                 |
| #3 "common bile duct"                                                    |
| #4 choledocholithiasis                                                   |
| #5 #1 or #2 or #3 or #4                                                  |
| #6 "bile duct"                                                           |
| #7 biliary                                                               |
| #8 choledochal                                                           |
| #9 choledochus                                                           |
| #10 "common duct"                                                        |
| #11 #6 or #7 or #8 or #9 or #10                                          |
| #12 stone                                                                |
| #13 stones                                                               |
| #14 calculus                                                             |
| #15 calculi                                                              |
| #16 gallstone                                                            |
| #17 gallstones                                                           |
| #18 "gall stone"                                                         |

(continued on the next page)

**SUPPLEMENTARY TABLE 4C. Continued**

|     |                                                                                                       |
|-----|-------------------------------------------------------------------------------------------------------|
| #19 | "gall stones"                                                                                         |
| #20 | #12 or #13 or #14 or #15 or #16 or #17 or #18 or #19                                                  |
| #21 | #11 and #20                                                                                           |
| #22 | #5 or #21                                                                                             |
| #23 | MeSH descriptor: [Balloon Enteroscopy] explode all trees                                              |
| #24 | MeSH descriptor: [Dilatation] explode all trees                                                       |
| #25 | Balloon                                                                                               |
| #26 | Dilatation                                                                                            |
| #27 | Dilation                                                                                              |
| #28 | Dilate                                                                                                |
| #29 | #23 or #24 or #25 or #26 or #27 or #28                                                                |
| #30 | MeSH descriptor: [Sphincterotomy, Endoscopic] explode all trees                                       |
| #31 | MeSH descriptor: [Sphincterotomy, Transduodenal] explode all trees                                    |
| #32 | MeSH descriptor: [Cholangiopancreatography, Endoscopic Retrograde] explode all trees                  |
| #33 | Endoscopic Retrograde Cholangiopancreatography                                                        |
| #34 | Endoscopic Retrograde Cholangiopancreatographies                                                      |
| #35 | Sphincterotomy                                                                                        |
| #36 | Sphincterotomies                                                                                      |
| #37 | Papillotomy                                                                                           |
| #38 | Papillotomies                                                                                         |
| #39 | Sphincteroplasty                                                                                      |
| #40 | Sphincteroplasties                                                                                    |
| #41 | Papillosphincteroplasty                                                                               |
| #42 | Papillosphincteroplasties                                                                             |
| #43 | Papillostomy                                                                                          |
| #44 | papillostomies                                                                                        |
| #45 | #30 or #31 or #32 or #33 or #34 or #35 or #36 or #37 or #38 or #39 or #40 or #41 or #42 or #43 or #44 |
| #46 | #22 and #29 and #45                                                                                   |

**SUPPLEMENTARY TABLE 4D. Web of Science**

|                                                                                                                                                                                                                                                                                                                |
|----------------------------------------------------------------------------------------------------------------------------------------------------------------------------------------------------------------------------------------------------------------------------------------------------------------|
| <b>Database Names:</b> Web of Science Core Collection                                                                                                                                                                                                                                                          |
| <b>Database Vendor:</b> Clarivate Analytics                                                                                                                                                                                                                                                                    |
| <b>Database Coverage:</b> Science Citation Index Expanded (1900-present)                                                                                                                                                                                                                                       |
| Social Sciences Citation Index (1900-present)                                                                                                                                                                                                                                                                  |
| Arts & Humanities Citation Index (1975-present)                                                                                                                                                                                                                                                                |
| Conference Proceedings Citation Index- cience (1990-present)                                                                                                                                                                                                                                                   |
| Conference Proceedings Citation Index-Social Science & Humanities (1990-present)                                                                                                                                                                                                                               |
| Book Citation Index -Science (2005-present)                                                                                                                                                                                                                                                                    |
| Book Citation Index - Social Sciences & Humanities (2005-present)                                                                                                                                                                                                                                              |
| Emerging Sources Citation Index (2015-present)                                                                                                                                                                                                                                                                 |
| Current Chemical Reactions (1985-present)                                                                                                                                                                                                                                                                      |
| Index Chemicus (1993-present)                                                                                                                                                                                                                                                                                  |
| <b>Date Last Searched:</b> November 16, 2017                                                                                                                                                                                                                                                                   |
| (Balloon OR Dilatation OR Dilation OR Dilate)                                                                                                                                                                                                                                                                  |
| AND                                                                                                                                                                                                                                                                                                            |
| (Endoscopic Retrograde Cholangiopancreatography OR Endoscopic Retrograde Cholangiopancreatographies OR Sphincterotomy OR Sphincterotomies OR Papillotomy OR Papillotomies OR Sphincteroplasty OR Sphincteroplasties OR Papillosphincteroplasty OR Papillosphincteroplasties OR Papillostomy OR papillostomies) |
| AND                                                                                                                                                                                                                                                                                                            |
| ((“common bile duct” OR choledocholithiasis OR choledocholithiases) OR (“bile duct” OR biliary OR choledochal OR choledocus OR “common duct”) NEAR/8 (stones OR calculi OR gallstones OR “gall stone” OR “gall stones”)))                                                                                      |

**SUPPLEMENTARY TABLE 5. Quality parameters (Newcastle-Ottawa Scale tool) of studies of intraductal and conventional treatment of large and difficult bile duct choledocholithiasis**

| First author             | Year | Journal         | Publication type | Study type | Selection | Comparability | Exposure/outcome |
|--------------------------|------|-----------------|------------------|------------|-----------|---------------|------------------|
| Akaraviputh              | 2013 | Surg Endo       | Abstract         | Cohort     | ****      |               | ***              |
| Akcakaya                 | 2009 | HPB Dis Int     | Full article     | Cohort     | ****      | **            | ***              |
| AlAmri                   | 1997 | Saudi Med J     | Full article     | Cohort     | ****      | **            | ***              |
| Alhalel                  | 1995 | GIE             | Abstract         | Cohort     | ****      |               | ***              |
| Aljebreen                | 2014 | Saudi J Gastro  | Full article     | Cohort     | ****      | **            | ***              |
| Arya                     | 2004 | AJG             | Full article     | Cohort     | ****      |               | ***              |
| Aslan                    | 2014 | PrzGastro       | Full article     | Cohort     | ****      | **            | ***              |
| Attasaranya              | 2008 | GIE             | Full article     | Cohort     | ****      | *             | ***              |
| Binmoeller <sup>72</sup> | 1993 | Endoscopy       | Full article     | Cohort     | ****      |               | ***              |
| Chan                     | 2011 | BMC Gastro      | Full article     | Cohort     | ****      |               | ***              |
| Chander                  | 2011 | GIE             | Abstract         | Cohort     | ****      |               | ***              |
| Chang <sup>71</sup>      | 2005 | WJG             | Full article     | Cohort     | ****      | *             | ***              |
| Chen                     | 2011 | GIE             | Full article     | Cohort     | ****      |               | ***              |
| Cheng                    | 2012 | WJG             | Full article     | Cohort     | ****      | **            | ***              |
| Cho                      | 2009 | GIE             | Full article     | Cohort     | ****      |               | ***              |
| Choi                     | 2009 | GIE             | Full article     | Cohort     | ****      |               | ***              |
| Choi                     | 2012 | JGH             | Full article     | Cohort     | ****      |               | ***              |
| Chung                    | 1991 | Brit J Surg     | Full article     | Cohort     | ****      |               | ***              |
| Cipolletta               | 1997 | Brit J Surg     | Full article     | Cohort     | ****      | *             | ***              |
| DiMitre                  | 2016 | WJG Endo        | Full article     | Cohort     | ****      |               | ***              |
| Draganov                 | 2009 | JCG             | Full article     | Cohort     | ****      |               | ***              |
| Elkholy                  | 2015 | HPB             | Abstract         | Unclear    | ****      |               | ***              |
| Ell                      | 1993 | GIE             | Full article     | Cohort     | ****      | *             | ***              |
| Ersoz <sup>54</sup>      | 2003 | GIE             | Full article     | Cohort     | ****      |               | ***              |
| Fan <sup>36</sup>        | 1989 | Aus Nz Surg     | Full article     | Cohort     | ****      |               | ***              |
| Farrell                  | 2005 | Endoscopy       | Full article     | Cohort     | ****      |               | ***              |
| Fujita                   | 2017 | Gut and Liver   | Full article     | Cohort     | ****      |               | ***              |
| Garg <sup>68</sup>       | 2004 | GIE             | Full article     | Cohort     | ****      | **            | ***              |
| Gunasingam               | 2017 | JGH             | Abstract         | Cohort     | ****      |               | ***              |
| Guo <sup>66</sup>        | 2014 | WJG             | Full article     | Cohort     | ****      | **            | ***              |
| Han <sup>128</sup>       | 2009 | AJG             | Full article     | Cohort     | ****      |               | ***              |
| Han                      | 2010 | Dig Endo        | Abstract         | Cohort     | ****      |               | ***              |
| Hanumantharaya           | 2014 | Gut             | Abstract         | Cohort     | ****      |               | ***              |
| Harada                   | 2013 | JHBP            | Full article     | Cohort     | ****      | **            | ***              |
| Hartery <sup>132</sup>   | 2017 | GIE             | Full article     | Cohort     | ****      |               | ***              |
| Heetun                   | 2015 | Irish J         | Abstract         | Cohort     | ****      |               | ***              |
| Hochberger               | 1998 | Gut             | Full article     | Cohort     | ****      |               | ***              |
| Hong                     | 2009 | GIE             | Abstract         | Unclear    | ****      | *             | ***              |
| Huang                    | 2017 | Dig Liv Dis     | Full article     | Cohort     | ****      |               | ***              |
| Hui <sup>126</sup>       | 2003 | Ali Pharm Thera | Full article     | Cohort     | ****      | **            | ***              |
| Hwang                    | 2013 | BMC Gastro      | Full article     | Cohort     | ****      | **            | ***              |
| Itoi <sup>75</sup>       | 2010 | GIE             | Full article     | Cohort     | ****      |               | ***              |
| Jain <sup>130</sup>      | 2000 | GIE             | Full article     | Cohort     | ****      |               | ***              |
| Jakobs                   | 2007 | Arq de Gastro   | Full article     | Cohort     | ****      |               | ***              |

*(continued on the next page)*

SUPPLEMENTARY TABLE 5. Continued

| First author           | Year | Journal             | Publication type | Study type   | Selection | Comparability | Exposure/outcome |
|------------------------|------|---------------------|------------------|--------------|-----------|---------------|------------------|
| Jang                   | 2013 | Dig Dis Diet        | Full article     | Cohort       | ****      |               | ***              |
| Jeong                  | 2012 | GIE                 | Abstract         | Cohort       | ****      |               | ***              |
| Jeong                  | 2015 | GIE                 | Abstract         | Cohort       | ****      |               | ***              |
| Johnson                | 1993 | GIE                 | Full article     | Cohort       | ****      |               | ***              |
| Jun Bo <sup>65</sup>   | 2013 | Pakistan J          | Full article     | Cohort       | ****      | **            | ***              |
| Kalaitzakis            | 2012 | Eur JGH             | Full article     | Cohort       | ****      |               | ***              |
| Kamada                 | 2015 | JGH (Aus)           | Abstract         | Cohort       | ****      |               | ***              |
| Karsenti <sup>57</sup> | 2017 | Endoscopy           | Full article     | Cohort       | ****      | **            | ***              |
| Katsinelos             | 2003 | Ann Gastro          | Full article     | Cohort       | ****      |               | ***              |
| Katsinelos             | 2008 | Dig Liv Dis (Italy) | Full article     | Cohort       | ****      | **            | ***              |
| Kim                    | 2007 | GIE                 | Full article     | Cohort       | ****      |               | ***              |
| Kim                    | 2008 | WJG                 | Full article     | Cohort       | ****      |               | ***              |
| Kim <sup>62</sup>      | 2009 | WJG                 | Full article     | Cohort       | ****      |               | ***              |
| Kim                    | 2010 | Digestion           | Abstract         | Cohort       | ****      |               | ***              |
| Kim                    | 2010 | WJG                 | Full article     | Cohort       | ****      |               | ***              |
| Kim                    | 2010 | Dig Endo            | Abstract         | Cohort       | ****      |               | ***              |
| Kim                    | 2011 | Surg Endo           | Full article     | Cohort       | ****      | **            | ***              |
| Kim                    | 2011 | JGH                 | Abstract         | Cohort       | ****      |               | ***              |
| Kim                    | 2011 | GIE                 | Full article     | Cohort       | ****      |               | **               |
| Kim                    | 2012 | GIE                 | Abstract         | Cohort       | ****      |               | ***              |
| Kim                    | 2014 | UE Gastro J         | Abstract         | Cohort       | ****      |               | ***              |
| Kochhar                | 2009 | DDS                 | Full article     | Cohort       | ****      |               | ***              |
| Kumar                  | 2011 | AJG                 | Abstract         | Cohort       | ****      |               | ***              |
| Kuo                    | 2016 | BMC Gastro          | Full article     | Cohort       | ****      |               | ***              |
| Kurita                 | 2010 | Scand J Gastro      | Full article     | Cohort       | ****      |               | ***              |
| Kurland                | 2009 | GIE                 | Abstract         | Cohort       | ****      |               | ***              |
| Kwok                   | 2009 | GIE                 | Abstract         | Cohort       | ****      |               | ***              |
| Laleman                | 2014 | Surg Endo           | Full article     | Cohort       | ****      |               | ***              |
| Lee                    | 2007 | Scand J Gastro      | Full article     | Cohort       | ****      |               | ***              |
| Lee                    | 2007 | Dig Endo            | Full article     | Cohort       | ****      |               | ***              |
| Lee                    | 2010 | Endoscopy           | Full article     | Cohort       | ****      |               | ***              |
| Lee                    | 2011 | GIE                 | Full article     | Cohort       | ****      |               | ***              |
| Lee                    | 2012 | Photomed Surg       | Full article     | Cohort       | ****      |               | ***              |
| Lee                    | 2016 | JGH                 | Abstract         | Cohort       | ****      |               | ***              |
| Lekharaju              | 2013 | JGH                 | Abstract         | Cohort       | ****      |               | ***              |
| Lesmana                | 1999 | Med J Indonesia     | Full article     | Cohort       | ****      |               | ***              |
| Leung                  | 1988 | GIE                 | Full article     | Cohort       | ****      |               | ***              |
| Li                     | 2015 | GIE                 | Abstract         | Cohort       | ****      |               | ***              |
| Liu                    | 2011 | Endoscopy           | Full article     | Cohort       | ***       |               | ***              |
| Lourenço               | 2015 | UE Gastro J         | Abstract         | Cohort       | ****      |               | ***              |
| Luz                    | 2012 | GIE                 | Abstract         | Cohort       | ****      |               | ***              |
| Matsukawa              | 2016 | GIE                 | Abstract         | Cohort       | ****      |               | ***              |
| Matsumi                | 2014 | JGH                 | Abstract         | Case control | *         | *             | ***              |
| Matsumoto              | 2016 | Surg Endo           | Full article     | Cohort       | ****      |               | ***              |
| Maydeo                 | 2007 | Endoscopy           | Full article     | Cohort       | ****      |               | ***              |

(continued on the next page)

SUPPLEMENTARY TABLE 5. Continued

| First author              | Year | Journal             | Publication type | Study type | Selection | Comparability | Exposure/outcome |
|---------------------------|------|---------------------|------------------|------------|-----------|---------------|------------------|
| Maydeo <sup>73</sup>      | 2011 | GIE                 | Full article     | Cohort     | ****      |               | ***              |
| Merino-Rodríguez          | 2013 | UE Gastro J         | Abstract         | Cohort     | ****      |               | ***              |
| Minami                    | 2007 | WJG                 | Full article     | Cohort     | ****      |               | ***              |
| Misra                     | 2008 | Endoscopy           | Full article     | Cohort     | ****      |               | ***              |
| Moon                      | 2004 | GIE                 | Full article     | Cohort     | ****      |               | ***              |
| Moon                      | 2009 | AJG                 | Full article     | Cohort     | ****      |               | ***              |
| Mu                        | 2015 | DDS                 | Full article     | Cohort     | ****      |               | ***              |
| Navaneethan <sup>69</sup> | 2016 | GIE                 | Full article     | Cohort     | ****      |               | ***              |
| Neuhaus                   | 1990 | GIE                 | Abstract         | Cohort     | ****      |               | ***              |
| Neuhaus                   | 1993 | Gut                 | Full article     | Cohort     | ****      |               | ***              |
| Neuhaus                   | 1994 | GIE                 | Full article     | Cohort     | ****      |               | ***              |
| Ödemış                    | 2016 | Gastro Res Prac     | Full article     | Cohort     | ****      | **            | ***              |
| Omuta                     | 2011 | JGH                 | Abstract         | Cohort     | ****      |               | ***              |
| Omuta                     | 2015 | WJG                 | Full article     | Cohort     | ****      |               | ***              |
| Paik                      | 2014 | Gut and Liver       | Full article     | Cohort     | ****      |               | ***              |
| Panpimanmas               | 2000 | J Med Assoc Thai    | Full article     | Cohort     | ****      |               | ***              |
| Park <sup>64</sup>        | 2013 | DDS                 | Full article     | Cohort     | ****      |               | ***              |
| Park                      | 2014 | DDS                 | Full article     | Cohort     | ****      |               | ***              |
| Park                      | 2016 | DDS                 | Full article     | Cohort     | ****      |               | ***              |
| Paspatis                  | 2013 | Dig Liv Dis         | Full article     | Cohort     | ****      |               | ***              |
| Patel                     | 2014 | GIE                 | Full article     | Cohort     | ****      |               | ***              |
| Pisello                   | 2008 | Langenbecks Ar Surg | Full article     | Cohort     | ****      |               | ***              |
| Poincloux                 | 2013 | Scand J Gastro      | Full article     | Cohort     | ****      |               | ***              |
| Ponchon                   | 1991 | Gastroenterology    | Full article     | Cohort     | ****      |               | ***              |
| Prat                      | 1994 | GIE                 | Full article     | Cohort     | ****      |               | ***              |
| Putta                     | 2009 | Gut                 | Abstract         | Cohort     | ****      |               | ***              |
| Rebello                   | 2012 | WJG                 | Full article     | Cohort     | ****      |               | ***              |
| Riemann                   | 1984 | GIE                 | Full article     | Cohort     | ****      |               | *                |
| Rosa                      | 2013 | WJG                 | Full article     | Cohort     | ****      |               | ***              |
| Sakai                     | 1999 | Unknown             | Abstract         | Cohort     | ****      |               | ***              |
| Sakai                     | 2013 | Hepato-Gastro       | Full article     | Cohort     | ****      |               | ***              |
| Sandha                    | 2016 | GIE                 | Abstract         | Cohort     | ****      |               | ***              |
| Satoh                     | 2014 | Pancreas            | Abstract         | Cohort     | ****      |               | ***              |
| Sauer                     | 2013 | DDS                 | Full article     | Cohort     | ****      |               | ***              |
| Schreiber                 | 1995 | GIE                 | Abstract         | Cohort     | ****      |               | ***              |
| Seelhoff                  | 2009 | GIE                 | Abstract         | Cohort     | ****      |               | ***              |
| Sharma                    | 2008 | WJG                 | Full article     | Cohort     | ****      |               | ***              |
| Sharma                    | 2014 | Ind J Gastro        | Full article     | Cohort     | ****      |               | ***              |
| Shi                       | 2014 | J Lap Adv Surg      | Full article     | Cohort     | ****      | **            | ***              |
| Sioulas                   | 2017 | Hep Panc Dis Int    | Full article     | Cohort     | ****      |               | ***              |
| Smith                     | 2009 | Gut                 | Abstract         | Cohort     | ****      |               | ***              |
| Soontornmanokul           | 2013 | GIE                 | Abstract         | Cohort     | ****      | *             | ***              |
| Sorbi                     | 1999 | GIE                 | Full article     | Cohort     | ****      |               | **               |
| Stefanidis <sup>70</sup>  | 2011 | AJG                 | Full article     | Cohort     | ****      | **            | ***              |
| Swahn                     | 2010 | Surg Endo           | Full article     | Cohort     | ****      |               | ***              |

(continued on the next page)

SUPPLEMENTARY TABLE 5. Continued

| First author              | Year | Journal           | Publication type | Study type | Selection | Comparability | Exposure/outcome |
|---------------------------|------|-------------------|------------------|------------|-----------|---------------|------------------|
| Swain                     | 1995 | GIE               | Abstract         | Cohort     | ****      |               | **               |
| Swan                      | 2013 | JGH               | Abstract         | Cohort     | ****      |               | ***              |
| Tariq Berlas              | 2009 | Gut               | Abstract         | Cohort     | ****      |               | ***              |
| Thienchanachaiya          | 2012 | GIE               | Abstract         | Cohort     | ****      | **            | ***              |
| Tonozuka                  | 2014 | DDS               | Full article     | Cohort     | ****      | *             | ***              |
| Tsuchida                  | 2015 | BMC Gastro        | Full article     | Cohort     | ****      | **            | ***              |
| Tsutsumi                  | 2016 | GIE               | Abstract         | Cohort     | ****      |               | ***              |
| Tsuyuguchi <sup>111</sup> | 2011 | Surg Endo         | Full article     | Cohort     | ****      | **            | ***              |
| Uskudar                   | 2013 | Turkish J Gastro  | Full article     | Cohort     | ****      |               | ***              |
| Vij                       | 1995 | Ind J Gastro      | Full article     | Cohort     | ****      |               | ***              |
| Wan                       | 2011 | Hep Panc Dis Int  | Full article     | Cohort     | ****      |               | ***              |
| Wong                      | 2017 | Endo Int Open     | Full article     | Cohort     | ****      |               | ***              |
| Xinopoulos                | 2013 | GIE               | Abstract         | Cohort     | ****      |               | ***              |
| Xu                        | 2017 | WJG               | Full article     | Cohort     | ****      |               | ***              |
| Yamauchi                  | 2017 | Surg Endo         | Full article     | Cohort     | ****      |               | ***              |
| Yang                      | 2013 | J Dig Dis         | Full article     | Cohort     | ****      |               | ***              |
| Ye                        | 2016 | Turkish J Gastro  | Full article     | Cohort     | ****      |               | ***              |
| Yoo                       | 2009 | GIE               | Abstract         | Cohort     | ****      |               | ***              |
| Yoon                      | 2014 | Dig Endo          | Full article     | Cohort     | ****      |               | ***              |
| Yüksel                    | 2016 | Turkish J Med Sci | Full article     | Cohort     | ****      |               | ***              |
| Zeng                      | 2014 | J Dig Dis         | Abstract         | Cohort     | ****      |               | ***              |
| Zippi                     | 2013 | W J Clin Cases    | Full article     | Cohort     | ****      |               | ***              |

A maximum of 4 stars may be allotted under "Selection," a maximum of 2 stars may be allotted under "Comparability," and a maximum of 3 stars may be allotted under "Exposure/Outcome."

From Wells GA, Shea B, O'Connell D, et al. The Newcastle-Ottawa Scale (NOS) for assessing the quality of nonrandomised studies in meta-analyses. Ottawa, Ontario, Canada: Ottawa Hospital Research Institute, 2016.
